# Supplementary material
Source: PubMed Central journal article supplement (PMC6939890)
Supplement: NIHMS1059985-supplement-1.pdf [file NIHMS1059985-supplement-1.pdf]

Table S1. Primers for PCR amplification of variable regions of *Mdwh* candidate genes

| Gene                   | SNP         | Forward Primer           | Reverse Primer        |
|------------------------|-------------|--------------------------|-----------------------|
| <b><i>Bub1b</i></b>    | rs3144766   | CTGACTCCCTCTTCTGGTGTG    | ACTATGCCTCTGGCCTTCCT  |
|                        | rs3149979   | CTCATTGCGAGGAGGTATCC     | GGAGCATGGAGAGTTGAAGG  |
|                        | rs3149980   | CCGCGTCTAGAACGGAGTTATC   | CAGATCCCCTGAGTCCTCACC |
|                        | rs27423851  | GTGGTACCTCCCAACCCTCT     | CCTGACCACATTCATTTGCTT |
|                        | rs27423850  | CCGTGTGTGTGTGTGTGTGT     | CCTGTGGCATTCAAATCACTT |
|                        | rs252392177 | AATGTTGGAGTTCCTCCCC      | GGCCTGTGGCATTCAAATC   |
| <b><i>DII4</i></b>     | rs27423747  | CAGGGAAGCCATGAACAATC     | CCAGGACAGCTAGGGCTACA  |
|                        | rs29576525  | CCCACCTTTACAGATCCAGCAA   | ACTCACTGCTCTGGGAAAGG  |
| <b><i>Dnajc17</i></b>  | rs8279388   | GGAAGAAGCCCTTGCAGATA     | GAGCAGGATATGGGAAGCTG  |
|                        | rs49263590  | TGTAGGCTAGGGTCCCTCTGG    | CCTCCTCACCCCTAGTGCATC |
|                        | rs27453586  | TCAAGGAAAGGCTAGGCTGA     | CTGTAACGTTGGCAGGTGTG  |
|                        | rs51167341  | TCAAGGAAAGGCTAGGCTGA     | CTGTAACGTTGGCAGGTGTG  |
|                        | rs46745469  | CTGTGGAAACGGAGAAGCAG     | AGCTTACAGGCGACCTTCCT  |
|                        | rs27453572  | CCCTCTCCAGATCTGCTCAA     | GGCCTGAGGGTGAGTAGCTT  |
| <b><i>Duox1</i></b>    | rs236906605 | GCCTACTGAGGCGTCATCTC     | GAGAGCCTCATCGTGTCTGG  |
|                        | rs229793548 | AGGTCAGGGCTTGGATTTG      | AGGGATGAGCAGAGTCAGGA  |
|                        | rs27453258  | CTTGCCTGGGCTGTGTCTTA     | CCCTGCCCTAATTCAGCAT   |
| <b><i>Duox2</i></b>    | rs217232017 | CCTGTGGATGGACTTCCTGT     | CCATTGGAGGCTAAGACCAG  |
|                        | rs27453362  | TGGTGGGTGACTCAACAGAG     | TTTTCTGACCTCCCCCTCTT  |
|                        | rs32841329  | GGGGTCCACATTGGAGACAG     | TGTGTCAACCAGTGGCATCT  |
|                        | rs27453345  | GGTGTTCGTTGCTCTACCA      | TGTGCATGCTGTCCTAGCTC  |
|                        | rs219434625 | CCAGCTGTCCCTCCAGAGAAG    | CTAAGGAGAGCGGGACCG    |
| <b><i>Duoxa1</i></b>   | rs47922057  | TGGTTTTGTGGGGCTCCAAT     | CCTGTGTCCCCTAACCACAC  |
|                        | rs27453307  | AATGTCTGGAGGCAGTCTGG     | TCCTCTTGCTCAGTTTGGAGA |
|                        | rs29816247  | TGCTTAGGAGCAACCCAAGG     | TCACCGCTGTCCCTAAATGG  |
| <b><i>Trp53bp1</i></b> | rs27454672  | AGTTGCTGCCGAGACAGTTT     | TCTTGAATCCATGCTCTCCA  |
|                        | rs27439904  | TCCTGCAAACTCACATGAGAGAAC | TTTGTCTCCACAGGGTG     |
|                        | rs29674073  | AGGGAGGAAAGGAAAAGCAG     | GAACCGACTCCTGAAAGCTG  |
